# Incidence and Relative Risk of infection with SARS-CoV-2 virus (Covid-19) in European Soccer Players.

Thomas B. Andersen, Andreas B. Dahl & Jeppe B. Carstensen

Department of Public Health - Sport Science, Aarhus University, Denmark

## Abstract

The purpose of the present study was to investigate the incidence and relative risk of infection with the SARS-CoV-2 virus in soccer players. Data from five leagues was used and compared to data from the normal population in each country. Our results revealed that the relative risk was higher in soccer players; in three countries, even when correcting for the estimated true number of infected people in the populations. We discuss that the reason for the higher incidence in soccer players is caused by letting the virus entering a group of players that work closely together.

## Introduction

Following the spread of the Covid-19 disease in the spring of 2020, most European countries emphasized social distancing among their protective measures. As a consequence, it was not possible to play soccer in those countries. However, studies showed that the risk of spreading the virus during play is minimal (Randers et al. 2021, Gonçalves et al. 2020 ). Accordingly, both recreational and professional soccer could be played in many countries during the late spring and summer.

In recreational soccer, only a limited number of people could play and train together. Furthermore, social distancing was emphasized off the field, meaning that the use of changing rooms and showering was limited to fewer people.

In professional soccer, protocols were produced to ensure a safe return to play. An example in English has been produced by Department for Digital, Culture, Media & Sport in the United Kingdom (Guidance: Elite sport Stage 1 to 5, 2020). Effort was made to test the players and staff at least once per week. The rationale behind this is that if players are tested frequently, the infection will not enter the group of players and, hence, they do not need to comply with the same social distancing-rules as the rest of the society when being inside their club. However, it is not known what the minimal testing

frequency should be, to avoid virus entering the group.

Accordingly, the purpose of the present study is to investigate the incidence of SARS-CoV-2 infections in professional soccer players and to compare this to the incidence of the normal population.

## Methods

The top leagues from five different countries were included in the study; England, Sweden, Denmark, Germany and Russia. The countries were selected based on the availability of data on the number of infected players or infected players & staff during the 2020/21-season. The period analyzed was from the beginning of the season until 3rd of January 2021. For the Russian League, data from april through September was used.

Data on the normal population, i.e. number of infected or dead per week was retrieved from the homepage of the European Centre for Disease Prevention and Control (ECDC) (<https://opendata.ecdc.europa.eu/covid19/national/casadeath/xlsx>)

Incidence for the normal population was calculated on basis of the total population, i.e. number of positive tests divided by the population.

Furthermore, the incidence was estimated, based on

**NOTE: This preprint reports new research that has not been certified by peer review and should not be used to guide clinical practice.**

the number of deaths, given an infection-fatality rate of 0.35% (Streeck et al. 2020).

The incidence rate for football players was calculated as the number of positive tests divided by the total number of players in a league. In cases where data is only available for a group consisting of both players and staff (English Premier League), the incidence rate for one week was calculated as the number of positive tests divided by the number of tests in one week. All players and staff are tested more than once per week, so the number of tests is higher than people in that group, leading to an under-estimation of the incidence.

The relative risk was calculated, based on the incidence (or estimated incidence) with 95% confidence intervals.

## Results

The incidence for soccer players was between 9.1% and 14.5% and the incidence for the normal population was between 0.75% and 2.6%.

The relative risk based on the number of infected people, was between 2.85 and 17.02, and all relative risks were significantly greater than 1. Table 1 shows a summary of the results from each country.

The relative risk, based on the estimated number of infected people varied between 0.9 and 3.49. A relative risk significantly above 1 was found in Denmark, Sweden and Russia.

Data from the English Premier League are published on a weekly basis. This enables a calculation of a weekly incidence and relative risk. These results can be seen in figures 1 and 2.

| Country | Incidence, Soccer players [%] | Incidence, normal population [%] | Relative risk | Confidence interval | Relative risk (estimate) | Confidence interval (estimate) |
|---------|-------------------------------|----------------------------------|---------------|---------------------|--------------------------|--------------------------------|
| Denmark | 9.9                           | 2.6                              | 3.56 *        | [2.52 - 5.04]       | 2.56 *                   | [1.80 - 3.62]                  |
| Germany | 9.1                           | 1.8                              | 4.70 *        | [3.50 - 6.33]       | 1.05                     | [0.78 - 1.41]                  |
| England | 10.4                          | 1.8                              | 2.85 *        | [2.47 - 3.29]       | 0.90                     | [0.79 - 1.02]                  |
| Russia  | 14.5                          | 0.75                             | 17.02 *       | [14.2 - 20.4]       | 3.49 *                   | [2.91 - 4.18]                  |
| Sweden  | 13.4                          | 2.4                              | 5.05*         | [4.28 - 5.96]       | 1.77 *                   | [1.50 - 2.08]                  |

Table 1. Summary of the results from each country. An asterisk (\*) shows a relative risk that is significantly greater than 1.

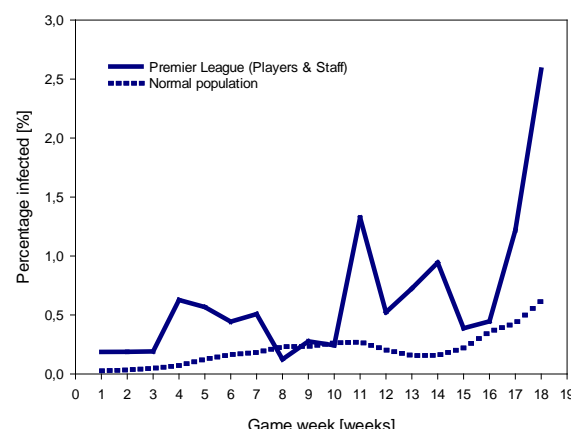

Figure 1. Incidence in Premier League players and the normal population in England graphed as a function of game-week.

## Discussion

Our calculations show that the relative risk of being infected with the SARS-CoV-2 virus is larger in soccer players than in the normal population. In Denmark, Sweden and Russia, this is even the case when trying to estimate the true number of infected people in a country.

Estimating the true number of infected people in a population can be done in several ways. We chose to estimate this by the number of deaths, since this seems to be the most consistent number. Other estimations include the percentage of positive tests or blood samples in groups of subjects. These estimations seem to give varying results.

We compared the incidence of positive tests from soccer players in the top league to the estimated incidence of the entire population in each country. The distribution of positive tests is typically not even through all age groups in a country. One of the groups testing positive most frequently is people at the age of 20-29 years. Most professional soccer players are in the same age group indicating this group tend to test positive more frequently when compared to the entire population. This leads to an overestimation of the effect of being a footballer on the increased risk of being infected with the SARS-CoV-2 virus.

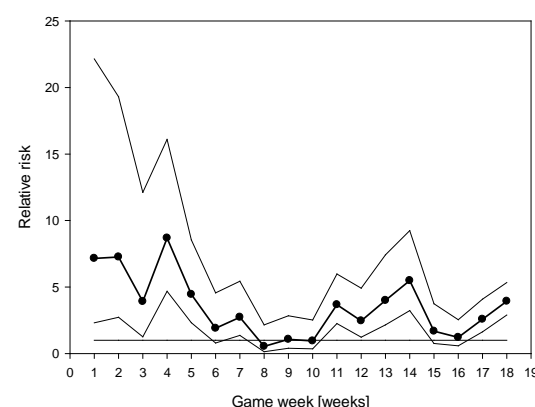

Figure 2. Relative risk, Premier League players compared to the normal population. The dots show the relative risk each week and the upper and lower confidence interval is shown. When the lower confidence interval is below 1 (horizontal line in the plot),  $p > 0.05$

Soccer players are tested frequently, and this should prevent the virus from entering a group of players. However, this does not seem to be the case. There are two possible explanations; either, the tests should be conducted more frequently, or the virus can spread before it can be detected in a test.

In the Guidance for Elite Sport in the United Kingdom, it is emphasized that “all individuals must abide by government and PHE guidelines whilst away from the Competition Venue”. By doing so, soccer players will minimize the risk of being infected, when being away from the club. As seen in the results, both soccer players and the normal population get infected. It can be discussed whether or not soccer players should comply better to the recommendations.

## References

- Randers MB, Knudsen NS, Thomasen MMD, et al. Danger zone assessment in small-sided recreational football: providing data for consideration in relation to COVID-19 transmission. *BMJ Open Sport & Exercise Medicine* 2021;7:e000911. doi:10.1136/bmjsem-2020-000911
- Gonçalves B, Mendes R, Folgado H, et al. Can tracking data help in assessing interpersonal contact exposure in team sports during the COVID-19 pandemic? *Sensors* 2020;20. doi:10.3390/s20216163.

Guidance: Elite sport Stage 1 to 5.

[www.gov.uk/government/publications/coronavirus-covid-19-guidance-on-phased-return-of-sport-and-recreation](https://www.gov.uk/government/publications/coronavirus-covid-19-guidance-on-phased-return-of-sport-and-recreation). Retrieved 15<sup>th</sup> January 2021

Eduard Bezuglov, Artemii Lazarev, Evgeniy Achkasov, Vladimir Khaitin, Larisa Romanova, Mikhail Butovskiy, Vladimir Khokhlov, Maxim Tsyplenko, Alexander Linskiy, Petr Chetverikov, Magomedtagir Sugaipov, Arseniy Petrov, Oleg Talibov. The Incidence and Severity of COVID-19 in Adult Professional Soccer Players. *medRxiv*, 2020.

**doi:** <https://doi.org/10.1101/2020.10.27.2022040>

Hendrik Streeck, Bianca Schulte, Beate M. Kümmerer, Enrico Richter, Tobias Höller, Christine Fuhrmann, Eva Bartok, Ramona Dolscheid-Pommerich, Moritz Berger, Lukas Wessendorf, Monika Eschbach-Bludau, Angelika Kellings, Astrid Schwaiger, Martin Coenen, Per Hoffmann, Birgit Stoffel-Wagner, Markus M. Nöthen, Anna M. Eis-Hübinger, Martin Exner, Ricarda Maria Schmuthausen, Matthias Schmid & Gunther Hartmann. Infection fatality rate of SARS-CoV2 in a super-spreading event in Germany, *Nature Communications* volume 11, Article number: 5829 (2020)  
<https://doi.org/10.1038/s41467-020-19509-y>
